# Supplementary material for: Carbon nanotubes decorated with Pt nanoparticles via electrostatic self-assembly: a highly active oxygen reduction electrocatalyst
Source: Royal Society of Chemistry journal article supplement (doi:10.1039/b919494k), 2010-01-01
Supplement: b919494k.pdf [file b919494k.pdf]

## Supplementary data

### **Carbon nanotubes decorated with Pt nanoparticles via electrostatic self-assembly: a highly active oxygen reduction electrocatalyst**

Sheng Zhang,<sup>1,2</sup> Yuyan Shao,<sup>2</sup> Geping Yin,<sup>\*,1</sup> Yuehe Lin <sup>\*,2</sup>

1. School of Chemical Engineering & Technology, Harbin Institute of Technology, Harbin 150001, China, 2. Pacific Northwest National Laboratory, Richland WA 99352, USA.

*Electrochemical measurements:* The electrochemical tests were carried out in a standard three-electrode system controlled with a CHI660C station (CH Instruments, Inc., USA) with Pt wire and Hg/Hg<sub>2</sub>SO<sub>4</sub> as the counter electrode and reference electrode, respectively. The working electrodes were prepared by applying catalyst ink onto the pre-polished glass carbon disk electrodes.<sup>1</sup> The total loading of catalyst was 15 μg (3 μg Pt). The linear sweep voltammograms (LSV) for oxygen-reduction reaction (ORR) is measured with a Pine rotator system (Pine Instruments Company, USA) in oxygen-saturated 0.5 M H<sub>2</sub>SO<sub>4</sub> solution between 1.0 V and 0.25 V at a scan rate of 10 mV s<sup>-1</sup>. The background current was measured similarly in an N<sub>2</sub> atmosphere without rotation. The durability tests were carried out in N<sub>2</sub>-saturated 0.5 M H<sub>2</sub>SO<sub>4</sub> solution with potential step method (1.4V \_ 10 s - 0.85 V \_ 5 s).<sup>1</sup> CVs in N<sub>2</sub>-purged 0.5 M H<sub>2</sub>SO<sub>4</sub> solution and LSV in O<sub>2</sub>-saturated 0.5 M H<sub>2</sub>SO<sub>4</sub> solution were recorded before and after the degradation test.

All the tests were conducted at room temperature. All potentials were reported versus reversible hydrogen electrode (RHE).

Reference:

1. Y. Y. Shao, R. Kou, J. Wang, V. V. Viswanathan, J. H. Kwak, J. Liu, Y. Wang, Y. H. Lin, *J. Power Sources*, 2008, **185**, 280-286.
